# Stimulus-induced narrow-band gamma oscillations in humans can be recorded using open-hardware low-cost EEG amplifier

Srividya Pattisapu<sup>1</sup>, Supratim Ray<sup>1, \*</sup>

<sup>1</sup> Centre for Neuroscience, Indian Institute of Science, Bengaluru, India Telephone +91 80 2293 3437, Facsimile +91 80 2360 3323

\*Corresponding author: [sray@iisc.ac.in](mailto:sray@iisc.ac.in)

Keywords: EEG, Gamma Oscillations, OpenBCI

## Abstract

1 Stimulus-induced narrow-band gamma oscillations (30–70 Hz) in human electro - encephalograph (EEG)  
2 have been linked to attentional and memory mechanisms and are abnormal in mental health conditions  
3 such as autism, schizophrenia and Alzheimer’s Disease. This suggests that gamma oscillations could  
4 be valuable both as a research tool and an inexpensive, non-invasive biomarker for disease evaluation.  
5 However, since the absolute power in EEG decreases rapidly with increasing frequency following a “ $1/f$ ”  
6 power law, and the gamma band includes line noise frequency, these oscillations are highly susceptible to  
7 instrument noise. Previous studies that recorded stimulus-induced gamma oscillations used expensive  
8 research-grade EEG amplifiers to address this issue. While low-cost EEG amplifiers have become popular  
9 in Brain Computer Interface applications that mainly rely on low-frequency oscillations ( $< 30$  Hz) or  
10 steady-state-visually-evoked-potentials, whether they can also be used to measure stimulus-induced gamma  
11 oscillations is unknown. We recorded EEG signals using a low-cost, open-source amplifier (OpenBCI)  
12 and a traditional, research-grade amplifier (Brain Products GmbH) in male ( $N = 6$ ) and female ( $N = 5$ )  
13 subjects (22–29 years) while they viewed full-screen static gratings that are known to induce gamma  
14 oscillations. OpenBCI recordings showed gamma response in almost all the subjects who showed a gamma  
15 response in Brain Products recordings, and the spectral and temporal profiles of these responses in alpha  
16 (8–13 Hz) and gamma bands were highly correlated between OpenBCI and Brain Products recordings.  
17 These results suggest that low-cost amplifiers can potentially be used in stimulus induced gamma response  
18 detection, making its research, and application in medicine more accessible.

## 19 Introduction

20 Gamma rhythms are narrow-band oscillations in the 30-70 Hz range of the brain’s electrical activity [1].  
21 They are associated with higher cognitive processes like attention [2, 3, 4], working memory [5] and feature  
22 binding [6], and are also found to be abnormal in mental health conditions like schizophrenia [7, 8], autism

---

[9] and Alzheimer's Disease (AD) [10]. Gamma oscillations can be induced in the occipital region of the brain when appropriate visual stimuli such as bars and gratings are presented to the subjects [11, 12], and such stimulus-induced gamma oscillations have been shown to decrease with healthy ageing [13] and with onset of AD [14]. Further, some studies have suggested a neuroprotective effect of entraining brain oscillations in the gamma range using sensory stimuli in rodent models of AD [15, 16, 17].

Power of EEG signals falls rapidly with frequency, following a  $1/f$  power-law distribution [18]. Therefore, higher frequencies have much lower absolute power and are more susceptible to instrument noise. Mains (line) noise (50 or 60 Hz depending on the local power-line frequency) also lies within the gamma range. These factors make detection of gamma band oscillations difficult. These issues can be partially addressed by using research-grade amplifiers which have low input referred noise (noise generated by the internal circuitry of the amplifier in the absence of signals), high Common Mode Rejection Ratio (which amplifies the differential voltage while attenuating the common voltage between the positive and negative inputs), high input impedance to minimise the effect of high electrode impedance, and proper shielding of the electrical components of the amplifiers to reduce electromagnetic interference [19]. However, such amplifiers are generally bulky, expensive and often require proprietary software for usage. Several low-cost EEG acquisition systems have been developed in recent years (e.g. Emotiv (Emotiv Inc., San Francisco, California, U.S.A), NeuroSky TGAM, OpenBCI (OpenBCI, Inc., Brooklyn, New York, USA, [www.openbci.com](http://www.openbci.com))), and their signal quality and performance has been studied in various contexts such as P-300 spelling task [20, 21], Motor imagery based BCI paradigm [22], drowsiness detection [23], motor tasks [24] and Steady State Visually Evoked Potentials (SSVEP) [25]. However, these studies involve assessment of signals present at frequencies lower than 40Hz. To the best of our knowledge, no study has tested whether stimulus-induced narrowband gamma rhythms can be detected using low-cost EEG amplifier systems.

We assessed the performance of OpenBCI, a popular affordable amplifier which provides a good cost-effectiveness [26], in the detection of gamma rhythms when static full-field gratings known to elicit gamma rhythms [12] were presented to healthy human subjects. OpenBCI recordings were compared to the recordings obtained using Brain Products GmbH, a popular research-grade amplifier, under identical experimental conditions on the same subjects. The same electrode cap, stimulus presentation software, and downstream analyses were used in both cases so that any difference was attributable only to the amplifiers. Full-screen gratings induce two distinct bands in the gamma range [12], termed slow gamma (20–34 Hz) and fast gamma (35–66 Hz) bands, which have characteristic spectral and temporal profiles [27]. Therefore, in addition to comparing the amplitude of change in band powers between stimulus and baseline, we also compared the spectral pattern and temporal evolution of the gamma bands between the two recording systems. In addition, we also compared the alpha band (8–13 Hz) power and temporal profiles.

## Methods

### Subjects

Eleven human subjects (6 males, 5 females, aged between 22–29 years) were recruited from the student community of the Indian Institute of Science, Bengaluru for the study on a voluntary basis against

---

62 monetary compensation. Informed consent was obtained from all the subjects prior to performing the  
63 experiment. All procedures were approved by the Institute Human Ethics Committee of the Indian  
64 Institute of Science.

## 65 **Data Acquisition**

66 For every subject, EEG signals were recorded using two amplifiers: BrainAmp DC EEG acquisition system  
67 (Brain Products GmbH, Gilching, Germany) and OpenBCI Cyton Biosensing Board. For proper compari-  
68 son, both were connected to the same electrode cap, OpenBCI EEG Electrode Cap, a 21-channel setup  
69 with sintered Ag/AgCl electrodes (<https://docs.openbci.com/Add0ns/Headwear/ElectrodeCap/>). We  
70 used 8 of these passive, gel-based electrodes at the following locations using the internationally recognised  
71 10–20 system [28]: O1, O2, P7, P3, Pz, P4, P8, CPz. During acquisition, the EEG signals were referenced  
72 to Cz (unipolar reference scheme [29]). If the impedance of any electrode exceeded 25 k $\Omega$ , it was rejected  
73 offline during analysis.

74 In the Brain Products setup, raw signals were recorded at 5 kHz native sampling rate in AC coupled  
75 mode, filtered online between 0.016 Hz (passive R-C hardware filter) and 250 Hz (fifth-order low pass, But-  
76 terworth hardware filter) and digitised at 16-bit resolution (0.1  $\mu$ V/bit). Next, following an automatically  
77 applied digital low-pass Butterworth filter of 112.5 Hz cut-off to prevent aliasing, the data was downsam-  
78 pled to 250 Hz. This signal processing pipeline was implemented using BrainVision Recorder (Version  
79 1.20.0701, Brain Products GmbH, Gilching, Germany). OpenBCI offers only an 8-channel recording with  
80 the requisite 250 Hz sampling rate, using a Bluetooth transmitter. While 16 channels can be used with an  
81 add-on board (OpenBCI Daisy board), it reduces the sampling rate to 125 Hz, which is too low for gamma  
82 range. A Wi-Fi shield was available which offered a higher sampling rate without losing on the channel  
83 availability, but it was still in beta phase at the time of our study. A higher sampling rate with 16 channels  
84 was also possible if data were recorded directly to the SD card on the equipment, but we opted to use  
85 streaming via Bluetooth for monitoring the signals in real time. For the OpenBCI setup, raw signals were  
86 recorded using OpenBCI GUI (version 5.0.2). Internally, OpenBCI first samples the signal at 1024 kHz in  
87 DC coupled mode followed by an R-C low-pass hardware filter of 72kHz. The signal is then digitised at  
88 24-bit resolution (0.002235  $\mu$ V/bit) followed by noise-shaping and a digital, third-order, low-pass sinc filter  
89 as the anti-aliasing filter (<https://www.ti.com/lit/ds/symlink/ads1299.pdf>) before downsampling  
90 to our chosen sampling rate of 250Hz. It was observed during experimental setup that the OpenBCI  
91 system was sensitive to ambient mains noise, especially when the digital I/O pins were used to collect  
92 event marker data, and care had to be taken to prevent small perturbations from creating noise artefacts.  
93 To reduce line noise during acquisition, the OpenBCI setup was placed inside a copper mesh, grounded to  
94 the UPS ground socket, to serve as a Faraday cage. Eye tracking (monocular, left eye) was done for ten  
95 out of eleven subjects using Eye-Link 1000 (SR Research, Ontario, Canada) sampled at 1 kHz.

## 96 **Experimental Setting and behavioural task**

97 All subjects sat in a dark room facing a gamma-corrected LCD monitor (BenQ XL2411; dimensions:  
98 20.92  $\times$  11.77 inches; resolution: 1289  $\times$  720 pixels; refresh rate: 100 Hz) with their head supported by a  
99 chin rest at a distance of 57 cm from the screen. The experiment was performed in two sessions for each  
100 subject, one with OpenBCI and one with Brain Products (sequence chosen randomly) separated by a

---

101 break for few minutes. Each session consisted of one minute of eye-open recording and one minute of  
102 eye-closed recording for measurement, followed by a visual fixation task. The entire experiment lasted for  
103 an average duration of 2.1 hours (minimum: 1.25 hours, maximum: 2.75 hours).

104 In the visual fixation task, each trial comprised of a 1 second fixation duration and 1 second stimulus  
105 duration, with a 1 second inter-trial interval. The stimuli presented were static, full-contrast, sinusoidal-  
106 luminance, achromatic gratings with a combination of one of the three spatial frequencies (1, 2 or 4 cycles  
107 per degree (cpd), calibrated to viewing distance) and one of the four orientations ( $0^\circ$ ,  $45^\circ$ ,  $90^\circ$  or  $135^\circ$ )  
108 and were displayed pseudorandomly using NIMH MonkeyLogic software (version 2.0.236 [30]). These  
109 stimulus parameters were chosen as they were previously shown to induce robust gamma [12]. Each of the  
110 two sessions consisted of an average of  $298 \pm 10$  trials (mean  $\pm$  SD), for the 12 stimulus types combined.  
111 Trials in which the eye tracker recorded an eye blink or a shift in eye position beyond a  $5^\circ$  fixation window  
112 during fixation period or stimulus period were rejected online by the stimulus presentation software. The  
113 event markers for each stimulus type were conveyed to the two EEG acquisition devices using National  
114 Instruments USB-6008 Multifunction I/O Device.

### 115 **Artefact Rejection**

116 A fully automated artefact rejection pipeline was used (for more details, see [13, 14]). Briefly, trials with  
117 deviation from the mean signal in either time or frequency domains by more than 6 standard deviations  
118 were labelled as outliers and rejected. Subsequently, data from electrodes with too many outliers ( $> 40\%$ )  
119 was discarded. This resulted in a rejection of  $21.4 \pm 16.6\%$  (mean  $\pm$  SD) of trials for the OpenBCI session  
120 and  $11.8 \pm 7.2\%$  of the trials for the Brain Products session. Finally, any electrode whose slope of the  
121 baseline power spectrum in the 56–84 Hz range was less than zero was rejected. This led to the rejection  
122 of 3 electrodes in 2 subjects, 1 electrode in 1 subject and no rejection in the remaining 8 subjects in  
123 OpenBCI recordings. In the Brain Products recordings, 2 electrodes were rejected in 1 subject, 1 electrode  
124 in 1 subject and no rejection in the remaining 9 subjects. If either of the electrodes of a bipolar pair (see  
125 below for details) was marked for rejection, the whole pair was removed from analysis.

### 126 **EEG Data Analysis**

127 All analyses were performed using bipolar referencing scheme. Every electrode was re-referenced offline  
128 to its neighbour, yielding 5 bipolar electrode pairs (P7-O1, P3-O1, CPz-Pz, P4-O2, P8-O2) from the  
129 8 unipolar electrodes. All the data analysis was done using custom codes written in MATLAB (The  
130 Mathworks Inc., 2021, version 9.10.0 (R2021a)). Brain Products data extraction included the usage of  
131 the ‘bva-io’ plug-in of EEGLAB toolbox (v12.0.2.5b [31], RRID: SCR\_007292). Voltage measurements  
132 in OpenBCI recordings were sign-flipped [21] and were corrected offline to match the Brain Products  
133 standard while plotting Event Related Potentials (ERPs). The mains noise component was selectively  
134 attenuated offline prior to spectral analysis as follows [32]. First, we divided the unsegmented raw data  
135 into 180-second segments that contain integer cycles of the mains noise frequency. For each segment,  
136 we identified the frequency with maximum power using Fast-Fourier Transform in the 40–60 Hz range  
137 (to account for minor variations in the line noise frequency). A pure sinusoidal wave of that frequency  
138 (generated using inverse-FFT with the power of all other frequencies set to zero) was subtracted from the  
139 raw data to obtain the mains-noise-filtered data. Because the line noise component was notched out at

---

140 high-frequency resolution, it was invisible in PSDs computed over short time segments. Linear detrending  
141 was done to the raw EEG signals to correct for slow drifts. Power Spectral Densities (PSDs) and the  
142 time–frequency spectra were computed using the multitaper method [33] with a single taper using the  
143 Chronux toolbox (<http://chronux.org/>, RRID:SCR\_005547 [34]). With timepoint 0 marking the onset of  
144 stimulus, baseline period was chosen between  $-750$  ms and  $0$  ms, and stimulus period was chosen between  
145  $+250$  ms and  $+1000$  ms, yielding a frequency resolution of  $1.33$  Hz for the PSDs. The periods were chosen  
146 to avoid stimulus-onset related transients. Time–frequency power spectra were calculated using a moving  
147 window of size  $250$  ms and a step size of  $25$  ms, giving a frequency resolution of  $4$  Hz.

148 Change in Power between stimulus and baseline periods for a frequency band was calculated using the  
149 following equation:

$$\Delta Power = 10 \log_{10} \frac{\sum_f ST(f)}{\sum_f BL(f)}$$

150 where  $ST$  is the stimulus power spectrum and  $BL$  is the baseline power spectrum, both averaged within  
151 relevant frequency bins ( $f$ ), across all analysable trials and electrodes. Band powers were specifically  
152 computed in three frequency bands, namely slow gamma ( $20$ – $34$  Hz), fast gamma ( $35$ – $66$  Hz), and alpha  
153 ( $8$ – $13$  Hz).

#### 154 Slope of the PSD plot

155 For slope calculation, the PSDs were fit with the following power law function [18]:

$$P = Af^{-\alpha} + B$$

156 where  $P$  is the power and  $f$  is the frequency, while  $A$  (scaling function),  $B$  (noise floor), and  $\alpha$  (slope)  
157 are free parameters. To avoid over-fitting, we set  $B$  as the power at max frequency ( $125$  Hz). Subsequently,  
158 linear regression was done on the log of Power (after subtracting the noise-floor) to obtain an estimate of  
159  $A$  and  $\alpha$ . As in our previous paper [13], slopes were calculated specifically for the  $16$ – $34$  Hz and  $54$ – $88$  Hz  
160 ranges to avoid contamination by the alpha range bump and line noise artefact and its harmonics.

#### 161 Correlation Analysis

162 Similarity between OpenBCI and Brain Product recordings was quantified using the Spearman correlation  
163 of the data points between the two sessions. For band powers, the data points were the change in band  
164 power between the stimulus and baseline averaged across electrodes (yielding one value per frequency  
165 band for each subject). For assessment of similarity of temporal evolution, the data points were the  
166 time series of the mean band power change obtained using time frequency spectra. Correlation measures  
167 between OpenBCI and Brain Product recordings of the same subject are termed ‘self-pair’ correlations,  
168 and between OpenBCI and Brain Product recordings of two different subjects are termed ‘cross-pair’  
169 correlations.

---

## 170 Statistical Analysis

171 Appropriate non-parametric tests (Mann Whitney U test (Wilcoxin rank sum test) [35], permutation test  
172 [36]) were used to interpret the findings. 0.05 was used as the cut-off for significance of the p-values.

## 173 Data and Code Availability

174 The data and codes used in this study are all made publicly available and can be found at <https://github.com/FlyingFordAnglia/OpenBCIGammaProject>.  
175

## 176 Results

### 177 Instrument noise

178 Before EEG recordings, we characterized the internal instrument noise characteristics by placing the  
179 recording electrodes, along with the reference and ground in a common conducting salt bath (dashed lines  
180 in Fig 1). The power spectral density (PSD) for OpenBCI recordings (red dashed lines) showed larger line  
181 noise at 50 Hz compared to Brain Products (blue dashed lines), and also exhibited three additional peaks  
182 at 14 Hz, 36 (50 – 14) Hz and 64 (50 + 14) Hz. These peaks are due to modulation of the mains noise,  
183 that occurs due to non-linear distortion during amplification. No such artefactual peaks were observed for  
184 the Brain Products system. Even after shielding the OpenBCI setup for EEG recordings (which reduced  
185 the noise peak at 50 Hz, see Methods for details), these three peaks could be observed for some subjects  
186 (as shown below).

### 187 Baseline PSDs and Slopes are comparable

188 Next, we compared EEG recordings in the pre-stimulus baseline period. Fig 1A (solid lines) shows the  
189 mean PSD across all subjects after averaging across all trials and up to 5 bipolar electrodes for each  
190 subject (see Methods for details). The Brain Products system had more mains noise than OpenBCI,  
191 possibly due to the usage of the Faraday shield for OpenBCI (no shield was used for Brain Products).  
192 To reduce the line noise artefact, we estimated the mains noise component in long segments of data and  
193 subtracted the same [32] before re-computing the PSD (see Methods for details), which yielded similar  
194 PSDs using both amplifiers (Fig 1B). The slopes of the PSDs computed at two different frequency ranges  
195 (16–34 Hz and 54–88 Hz as per our previous report [13]) were not significantly different between OpenBCI  
196 and Brain Products recordings (Fig 1C and 1D: raw-data: 16–34 Hz:  $p = 0.69$ , 54–88 Hz:  $p = 0.33$ ,  
197 noise-corrected data: 16–34 Hz:  $p = 0.90$ ; 54–88 Hz:  $p = 0.74$ ; two-tailed Mann Whitney U test). The  
198 PSDs of the two systems were highly correlated (spearman correlation coefficient of 0.91 for raw data  
199 ( $p < 10^{-6}$ , calculated using permutation test) and 0.93 for noise corrected data ( $p < 10^{-6}$ )).

200 Fig 2 shows the results of an example subject (subject S2) for the visual fixation task. Trial and  
201 electrode averaged evoked potentials are plotted for OpenBCI (Fig 2A, left column) and Brain Products  
202 (Fig 2A, right column). These traces revealed a transient in the first 200 ms after stimulus onset and  
203 after the stimulus offset (i.e. after +1000ms). Change in power in stimulus period compared to baseline  
204 power revealed a prominent suppression in the alpha range and in increase in slow gamma power in both  
205 OpenBCI and Brain Products (Fig 2A, second row). There was also a broadband increase in power

---



206 beyond the slow-gamma range, which was more prominent in Brain Products compared to OpenBCI.  
207 Power increase in the alpha band after 1000ms of the trial was likely an eye blink or movement artefact  
208 during the inter-trial period. Fig 2C shows the PSD of the stimulus and baseline periods for the two  
209 amplifiers, demonstrating alpha (8–13 Hz) suppression and an increase in power in the slow-gamma (20–34  
210 Hz) and the fast-gamma (35–66 Hz) bands, with the fast-gamma response being more appreciable in the  
211 Brain Products recording. Fig 2D shows the baseline subtracted PSDs for the two systems illustrating the  
212 same trend as above (since the log of PSD is subtracted, it is essentially a change in power from baseline,  
213 expressed in decibels). The change in power in alpha, slow and fast gamma bands as a function of time  
214 from their respective pre-stimulus baseline power is shown in Fig 2B. Overall, the increase in the band  
215 power is lower in OpenBCI than Brain Products for both the gamma bands, while it is similar for the  
216 alpha band (Fig 2A second row, 2B, 2C, 2D). Small noise peaks placed symmetrically around the mains  
217 noise band, indicating modulation distortions (also see Fig 1), can be observed in the PSDs of OpenBCI  
218 in this subject (Fig 2C, first column). However, since this noise is present in both pre-stimulus baseline  
219 period and stimulus-period, it gets cancelled out when we compute the change in power from baseline  
220 (Fig 2C, 2D).

### 221 Spectral and temporal patterns show similarity

222 Fig 3 shows the results of the visual fixation task for all the subjects sorted by decreasing gamma power.  
223 Visually similar results were obtained in the baseline-subtracted time frequency spectra of OpenBCI (first  
224 column) and Brain Products (second column). The change in power from baseline during stimulus at each  
225 frequency (Figure 3, third column), and the change in mean band power (in dB) of alpha, slow gamma  
226 and fast gamma bands with time (Fig 3, 4th, 5th and 6th columns respectively) also showed visually  
227 similar trends. However, the amplitude of change in band power can be seen to be lower in OpenBCI  
228 than in Brain Products in most subjects for the gamma bands, in particular for the fast gamma band.

229 We considered a subject as having a “gamma response” if they showed a significant increase in band  
230 power between stimulus and baseline when compared across all trials using one-tailed Mann-Whitney U  
231 test. False Discovery Rate (FDR) was controlled using the Benjamini and Hochberg procedure [37]. With  
232 this criterion, 6 subjects (S1-S6) were found to have slow gamma response using both Brain Products and  
233 OpenBCI. For fast gamma, 5 subjects (S1-S4,S7) showed a fast gamma response with Brain Products, out  
234 of which 4 subjects showed a fast gamma response (S1-S4) with OpenBCI. A significant alpha suppression  
235 was observed in 10 subjects (all subjects except S5) using Brain Products and 9 subjects (all subjects  
236 except S5 and S10) using OpenBCI. In subject S10, while it is not apparent visually in Fig 3, there  
237 was a very small fast gamma increase ( $\approx 0.1$  dB increase from baseline in stimulus period) in OpenBCI  
238 recordings that was registered as significant by the statistical test we used, even after multiple testing  
239 correction. Similarly, alpha suppression in this subject was significant with Brain Products (but not  
240 OpenBCI), even though the suppression was small ( $\approx 0.76$  dB reduction from baseline in stimulus period).  
241 Overall, these results indicate that the power changes obtained using Brain Products and OpenBCI  
242 were highly consistent. To quantify these results, we computed the correlation between the change in  
243 band power from baseline in each frequency band of each subject using OpenBCI with that of Brain  
244 Products (Fig 4). The Spearman correlation coefficient for alpha band was 0.92 ( $p < 10^{-6}$ , computed  
245 using permutation test), for slow gamma was 0.94 ( $p < 10^{-6}$ ) and for fast gamma was 0.75 ( $p = 0.012$ ).  
246 For frequency wise correlation values across all subjects, see Supplementary Fig S1.

## 247 **Amplitude of change in band powers appears to be better captured by Brain Products than** 248 **OpenBCI**

249 Although the correlation between power obtained using the two amplifiers was high, the distribution of  
250 points around the identity line (Fig 4) indicates that the amplitude of band power change was generally  
251 greater in Brain Products than OpenBCI. For alpha band, most points lay below the identity line indicating  
252 that alpha suppression was better captured by Brain Products than OpenBCI. For fast gamma, the  
253 enhancement in gamma power was again better captured with Brain Products than OpenBCI, with the  
254 majority of data points above the identity line. For slow-gamma, the difference between the two devices  
255 appear less salient. However, note that the power in slow-gamma band is influenced by two opposing  
256 factors. First, there is an increase in power due to the slow-gamma rhythm, which is observed in about  
257 half of the subjects (S1-S6). However, there is also a reduction in power in lower frequencies, which  
258 sometimes extended to the slow-gamma range. This is better observed in the subjects (S7-S11) who did  
259 not have a strong slow-gamma rhythm, and their corresponding data points lay below zero dB in Figure 4  
260 (middle panel). For those subjects, the points lay below the identity line, again reflecting better capture of  
261 low-frequency suppression by Brain Products than OpenBCI, and not poorer capture of the slow-gamma  
262 rhythm by Brain Products compared to OpenBCI.

## 263 **ERPs are comparable but with a small latency**

264 Figure 5 shows the de-trended and de-noised (see Methods for details) ERPs of OpenBCI and Brain  
265 Products for all subjects. A slight jitter can be seen in the OpenBCI traces compared to the Brain  
266 Products traces. Computing the cross-correlation between the two traces led to a median correlation ( $\pm$   
267 standard error; computed using bootstrapping) of  $0.79 \pm 0.05$ , with OpenBCI traces lagging by  $8 \pm 0.5$   
268 milliseconds (cross-correlation value and the lag for each subject are indicated in the figure).

## 269 **Similarity between the two recordings within and between subjects**

270 Next, we compared the temporal profile and the characteristic spectral distribution (see Introduction)  
271 between the two setups. The similarity of the change in band powers with time, and baseline subtracted  
272 PSDs of the two EEG amplifiers was quantified using Spearman correlation between the time series for  
273 each subject (see Methods). However, a high correlation between OpenBCI and Brain Products traces  
274 may be confounded by the possibility that the spectral profile in response to visual stimulus is common to  
275 all subjects. A previous study suggests that spectral and temporal profiles are unique to subjects and  
276 different in different subjects [27]. To assert whether these correlations indeed represent subject-specific  
277 trends and not a general similarity of all traces, we further compared self-pair (between the same subject)  
278 and cross-pair (between different subjects) correlations. Self-pair correlations of baseline-subtracted PSD  
279 ( $0.51 \pm 0.1$ , median  $\pm$  standard error computed using bootstrapping) were significantly higher than its  
280 cross-pair correlations ( $0.33 \pm 0.02$ ,  $p = 1.07 \times 10^{-4}$ , one sided Mann Whitney U test, Fig 6A). Similar  
281 results were obtained for the temporal evolution traces in alpha, slow gamma and fast gamma bands:(alpha:  
282 self:  $0.93 \pm 0.04$ ; cross:  $0.52 \pm 0.07$ ,  $p = 7.4 \times 10^{-6}$ , Fig 6B; slow gamma: self:  $0.82 \pm 0.05$ ; cross:  $0.31 \pm 0.06$ ,  
283  $p = 6.01 \times 10^{-6}$ , Fig 6C; fast gamma: self:  $0.68 \pm 0.15$ , cross:  $0.22 \pm 0.04$ ,  $p = 2.7 \times 10^{-4}$ , Fig 6D). When  
284 self-pair correlations were plotted against cross-pair correlations, their values were concentrated on the  
285 x-axis side of the identity line (Fig 6).

---



## 286 Discussion

287 Our study is the first one to assess the performance of a low-cost amplifier in the detection of stimulus  
288 induced gamma response and compare it with a research grade amplifier while controlling for subjects,  
289 electrodes and electrode placement, task performed and subsequent analysis. We showed that a low-cost  
290 EEG amplifier like OpenBCI is able to detect gamma response in subjects, and the spectral and temporal  
291 profiles from OpenBCI recordings are correlated to that of a research grade amplifier like Brain Products  
292 when full screen static gratings are presented as stimuli. However, the change in power in the gamma band  
293 was of a lower amplitude in OpenBCI than Brain Products, especially in the fast gamma band. Correlations  
294 between the two recordings of the same subjects ('self-pair correlations') were significantly higher than  
295 correlations between different subjects ('cross-pair correlations') indicating that the distinctiveness in  
296 spectral and temporal profiles across different subjects could be captured by these amplifiers.

### 297 Comparisons between low-cost and research-grade amplifiers in previous studies:

298 Previous studies have assessed the performance of low-cost EEG amplifiers in various contexts. While some  
299 studies have only assessed the performance of a low-cost amplifier in the absence of a research grade control  
300 [22, 38], others have compared their performance with a research grade amplifier but have not controlled  
301 for factors like the use of same electrodes, same subjects or downstream analysis to reliably attribute  
302 all differences only to the amplifiers [39, 40]. de Vos and colleagues [20] compared the performance of  
303 an Emotiv based setup with Brain Products GmbH with the same electrodes in the context of a P300  
304 spelling task in 13 subjects. However, they mainly compared the P300 ERP topographies and spelling  
305 task performance ( $r > 0.77$ ), with no frequency domain comparison. In a study done by Frey, 2016 [21],  
306 OpenBCI signals were compared to the signals from g.tec g.USBamp amplifier (another research grade  
307 amplifier) from one subject in a P300 spelling task and a working memory load task. The study used a  
308 custom adapter which enabled simultaneous recording with two amplifiers using the same electrodes in  
309 the same recording session. The study reported a high correlation between ERPs and PSDs of the two  
310 amplifiers ( $r > 0.99$ ). Their simultaneous recording from the two amplifiers in a single recording session  
311 as opposed to our sequential recording sessions and their low sample size ( $n = 1$ ) could be an explanation  
312 for the lower ERP correlation values (mean  $r = 0.79$ ) and PSD correlation values we found in our study  
313 during baseline period ( $r = 0.93$ ). Also, their spectral analyses were restricted to frequencies  $< 40$  Hz,  
314 which does not include the mains noise range, potentially contributing to a higher correlation value. They  
315 also reported a slight jitter (88 ms) in the ERP of OpenBCI compared to g.tec. While we have also found  
316 a small jitter in the ERP of OpenBCI (median lag = 8 ms, Fig 4) compared to Brain Products, we did  
317 not correct for it since all our analyses were in the frequency domain. Rashid et. al. [24] reported no  
318 significant difference in the power of signals between OpenBCI and NuAmps (another research grade  
319 amplifier) in the beta band (12–38 Hz, which includes slow gamma frequencies) in 22 participants, but  
320 the task performed was a motor task.

### 321 Comparison in performance of OpenBCI for different frequency bands

322 Previous studies have shown that in the presence of static, full-field visual gratings, two gamma bands  
323 are found in the EEG: a slow gamma band (20–34 Hz) and a fast gamma band (35–66 Hz) [12, 13].  
324 In addition, alpha band is also suppressed. In our study, slow gamma found to be better retrieved by

---

325 OpenBCI than fast gamma in terms of amplitude of change in band power and correlation of its temporal  
326 evolution (Fig 3, 6). This could be due to the contamination of fast gamma with the cross-modulation  
327 noise bands (Fig 1, dashed lines and Fig 2C, left). Slow gamma and fast gamma bands were both found  
328 to be reduced in Alzheimer’s disease and Mild Cognitive Impairment patients in a study done by Murty  
329 and colleagues [14]. Further, previous studies have shown that slow gamma band is more reliable with age  
330 than fast gamma [13] and shows more inter-subject variability and better test-retest reliability [27]. This  
331 raises the possibility of using OpenBCI to detect slow gamma as a biomarker or screening tool in low  
332 resource settings.

## 333 Conclusion

334 OpenBCI is a low-cost EEG amplifier whose open-hardware nature offers customisability and ease of  
335 interface with existing equipment, and its lack of bulk offers mobility which allows extensibility of  
336 experiments and usage in natural environments outside of dedicated laboratories. Our study suggests that  
337 OpenBCI has potential as a low-cost alternative to traditional research grade amplifiers in the detection  
338 of stimulus-induced gamma oscillations.

## 339 Declaration of Interests

340 The authors declare no competing financial interests

## 341 Author Contributions

342 S.P and S.R. conceived the idea of research, S.P. collected the data; S.P. and S.R. analyzed the data and  
343 wrote the paper.

## 344 Funding Disclosure

345 This work was supported by Tata Trusts Grant, Wellcome Trust/DBT India Alliance (Senior fellowship  
346 IA/S/18/2/504003 to SR), and DBT-IISc Partnership Programme.

## References

- [1] György Buzsáki and Xiao-Jing Wang. Mechanisms of gamma oscillations. *Annual review of neuroscience*, 35:203–225, 2012. PMID: 22443509 PMID: PMC4049541.
  - [2] P. Fries. Modulation of oscillatory neuronal synchronization by selective visual attention. *Science*, 291(5508):1560–1563, 2 2001. [Online; accessed 2021-09-27].
  - [3] G. G. Gregoriou, S. J. Gotts, H. Zhou, and R. Desimone. High-frequency, long-range coupling between prefrontal and visual cortex during attention. *Science*, 324(5931):1207–1210, 5 2009. [Online; accessed 2021-09-27].
-

- [4] Matthew Chalk, Jose L. Herrero, Mark A. Gieselmann, Louise S. Delicato, Sascha Gotthardt, and Alexander Thiele. Attention reduces stimulus-driven gamma frequency oscillations and spike field coherence in v1. *Neuron*, 66(1):114–125, 4 2010. [Online; accessed 2021-09-27].
  - [5] Bijan Pesaran, John S. Pezaris, Maneesh Sahani, Partha P. Mitra, and Richard A. Andersen. Temporal structure in neuronal activity during working memory in macaque parietal cortex. *Nature Neuroscience*, 5(8):805–811, 8 2002. [Online; accessed 2021-09-27].
  - [6] Charles M. Gray, Peter König, Andreas K. Engel, and Wolf Singer. Oscillatory responses in cat visual cortex exhibit inter-columnar synchronization which reflects global stimulus properties. *Nature*, 338(6213):334–337, 3 1989. [Online; accessed 2021-09-27].
  - [7] Yoji Hirano, Naoya Oribe, Shigenobu Kanba, Toshiaki Onitsuka, Paul G. Nestor, and Kevin M. Spencer. Spontaneous gamma activity in schizophrenia. *JAMA Psychiatry*, 72(8):813, 8 2015. [Online; accessed 2021-09-27].
  - [8] Mariko Tada, Tatsuya Nagai, Kenji Kirihara, Shinsuke Koike, Motomu Suga, Tsuyoshi Araki, Tetsuo Kobayashi, and Kiyoto Kasai. Differential alterations of auditory gamma oscillatory responses between pre-onset high-risk individuals and first-episode schizophrenia. *Cerebral Cortex*, 26(3):1027–1035, 3 2016. [Online; accessed 2021-09-27].
  - [9] Kyung-min An, Takashi Ikeda, Yuko Yoshimura, Chiaki Hasegawa, Daisuke N. Saito, Hirokazu Kumazaki, Tetsu Hirosawa, Yoshio Minabe, and Mitsuru Kikuchi. Altered gamma oscillations during motor control in children with autism spectrum disorder. *The Journal of Neuroscience*, 38(36):7878–7886, 9 2018. [Online; accessed 2021-09-27].
  - [10] Laure Verret, Edward O. Mann, Giao B. Hang, Albert M. I. Barth, Inma Cobos, Kaitlyn Ho, Nino Devidze, Eliezer Masliah, Anatol C. Kreitzer, Istvan Mody, Lennart Mucke, and Jorge J. Palop. Inhibitory interneuron deficit links altered network activity and cognitive dysfunction in alzheimer model. *Cell*, 149(3):708–721, 4 2012. publisher: Elsevier PMID: 22541439.
  - [11] Xiaoxuan Jia, Seiji Tanabe, and Adam Kohn. Gamma and the coordination of spiking activity in early visual cortex. *Neuron*, 77(4):762–774, 2 2013. [Online; accessed 2021-10-27].
  - [12] Dinavahi V.P.S. Murty, Vinay Shirhatti, Poojya Ravishankar, and Supratim Ray. Large visual stimuli induce two distinct gamma oscillations in primate visual cortex. *The Journal of Neuroscience*, 38(11):2730–2744, 3 2018. [Online; accessed 2021-09-19].
  - [13] Dinavahi V.P.S. Murty, Keerthana Manikandan, Wupadrasta Santosh Kumar, Ranjini Garani Ramesh, Simran Purokayastha, Mahendra Javali, Naren Prahalada Rao, and Supratim Ray. Gamma oscillations weaken with age in healthy elderly in human eeg. *NeuroImage*, 215:116826, 7 2020. [Online; accessed 2021-09-19].
  - [14] Dinavahi VPS Murty, Keerthana Manikandan, Wupadrasta Santosh Kumar, Ranjini Garani Ramesh, Simran Purokayastha, Bhargavi Nagendra, Abhishek MI, Aditi Balakrishnan, Mahendra Javali, Naren Prahalada Rao, and Supratim Ray. Stimulus-induced gamma rhythms are weaker in human elderly with mild cognitive impairment and alzheimer’s disease. *eLife*, 10:e61666, 6 2021. [Online; accessed 2021-09-19].
-

- [15] Chinnakkaruppan Adaikkan, Steven J. Middleton, Asaf Marco, Ping-Chieh Pao, Hansruedi Mathys, David Nam-Woo Kim, Fan Gao, Jennie Z. Young, Ho-Jun Suk, Edward S. Boyden, Thomas J. McHugh, and Li-Huei Tsai. Gamma entrainment binds higher-order brain regions and offers neuroprotection. *Neuron*, 102(5):929–943.e8, 6 2019. [Online; accessed 2021-09-27].
  - [16] Hannah F. Iaccarino, Annabelle C. Singer, Anthony J. Martorell, Andrii Rudenko, Fan Gao, Tyler Z. Gillingham, Hansruedi Mathys, Jinsoo Seo, Oleg Kritskiy, Fatema Abdurrob, Chinnakkaruppan Adaikkan, Rebecca G. Canter, Richard Rueda, Emery N. Brown, Edward S. Boyden, and Li-Huei Tsai. Gamma frequency entrainment attenuates amyloid load and modifies microglia. *Nature*, 540(7632):230–235, 12 2016. [Online; accessed 2021-09-27].
  - [17] Anthony J. Martorell, Abigail L. Paulson, Ho-Jun Suk, Fatema Abdurrob, Gabrielle T. Drummond, Webster Guan, Jennie Z. Young, David Nam-Woo Kim, Oleg Kritskiy, Scarlett J. Barker, Vamsi Mangena, Stephanie M. Prince, Emery N. Brown, Kwanghun Chung, Edward S. Boyden, Annabelle C. Singer, and Li-Huei Tsai. Multi-sensory gamma stimulation ameliorates alzheimer’s-associated pathology and improves cognition. *Cell*, 177(2):256–271.e22, 4 2019. [Online; accessed 2021-09-27].
  - [18] Kai J. Miller, Larry B. Sorensen, Jeffrey G. Ojemann, and Marcel den Nijs. Power-law scaling in the brain surface electric potential. *PLoS Computational Biology*, 5(12):e1000609, 12 2009. [Online; accessed 2021-09-19].
  - [19] Ali Bulent Usakli. Improvement of eeg signal acquisition: An electrical aspect for state of the art of front end. *Computational Intelligence and Neuroscience*, 2010:e630649, 2 2010. publisher: Hindawi.
  - [20] Maarten De Vos, Markus Kroesen, Reiner Emkes, and Stefan Debener. P300 speller bci with a mobile eeg system: comparison to a traditional amplifier. *Journal of Neural Engineering*, 11(3):036008, 6 2014. [Online; accessed 2021-09-28].
  - [21] Jérémy Frey. Comparison of an open-hardware electroencephalography amplifier with medical grade device in brain-computer interface applications. *arXiv:1606.02438 [cs]*, 6 2016. arXiv: 1606.02438.
  - [22] Victoria Peterson, Catalina Galván, Hugo Hernández, and Ruben Spies. A feasibility study of a complete low-cost consumer-grade brain-computer interface system. *Heliyon*, 6(3):e03425, 3 2020. [Online; accessed 2021-09-27].
  - [23] John LaRocco, Minh Dong Le, and Dong-Guk Paeng. A systemic review of available low-cost eeg headsets used for drowsiness detection. *Frontiers in Neuroinformatics*, 14:553352, 10 2020. [Online; accessed 2021-09-27].
  - [24] Usman Rashid, Imran Niazi, Nada Signal, and Denise Taylor. An eeg experimental study evaluating the performance of texas instruments ads1299. *Sensors*, 18(11):3721, 11 2018. [Online; accessed 2021-09-27].
  - [25] Phattarapong Sawangjai, Supanida Hompoonsup, Pitshaporn Leelaarporn, Supavit Kongwudhikunakorn, and Theerawit Wilaiprasitporn. Consumer grade eeg measuring sensors as research tools: A review. *IEEE Sensors Journal*, 20(8):3996–4024, 4 2020. [Online; accessed 2021-10-10].
-

- [26] Audrey Aldridge, Eli Barnes, Cindy L. Bethel, Daniel W. Carruth, Marianna Kocturova, Matus Pleva, and Jozef Juhar. Accessible electroencephalograms (eegs): A comparative review with openbci's ultracortex mark iv headset. pages 1–6, Pardubice, Czech Republic, 4 2019. 2019 29th International Conference Radioelektronika (RADIOELEKTRONIKA), IEEE. [Online; accessed 2021-09-27].
  - [27] Wupadrasta Santosh Kumar, Keerthana Manikandan, Dinavahi V.P.S. Murty, Ranjini Garani Ramesh, Simran Purokayastha, Mahendra Javali, Naren Prahallada Rao, and Supratim Ray. Stimulus-induced narrowband gamma oscillations are test-retest reliable in healthy elderly in human eeg. *bioRxiv*, 2021.
  - [28] Daniel Silverman. The rationale and history of the 10-20 system of the international federation. *American Journal of EEG Technology*, 3(1):17–22, 3 1963. [Online; accessed 2021-09-28].
  - [29] Dezhong Yao, Yun Qin, Shiang Hu, Li Dong, Maria L. Bringas Vega, and Pedro A. Valdés Sosa. Which reference should we use for eeg and erp practice? *Brain Topography*, 32(4):530–549, 7 2019. [Online; accessed 2021-09-28].
  - [30] Jaewon Hwang, Andrew R. Mitz, and Elisabeth A. Murray. Nih monkeylogic: Behavioral control and data acquisition in matlab. *Journal of Neuroscience Methods*, 323:13–21, 7 2019. [Online; accessed 2021-09-28].
  - [31] Arnaud Delorme and Scott Makeig. Eeglab: an open source toolbox for analysis of single-trial eeg dynamics including independent component analysis. *Journal of Neuroscience Methods*, 134(1):9–21, 3 2004. [Online; accessed 2021-09-19].
  - [32] Thilo Womelsdorf, Jan-Mathijs Schoffelen, Robert Oostenveld, Wolf Singer, Robert Desimone, Andreas K. Engel, and Pascal Fries. Modulation of neuronal interactions through neuronal synchronization. *Science*, 316(5831):1609–1612, 6 2007. [Online; accessed 2021-11-04].
  - [33] D.J. Thomson. Spectrum estimation and harmonic analysis. *Proceedings of the IEEE*, 70(9):1055–1096, 9 1982. event: Proceedings of the IEEE.
  - [34] P. P. Mitra and H. S. Bokil. *Observed Brain Dynamics*. Oxford University Press, 2007. page: 408 container-title: Oxford University Press.
  - [35] H. B. Mann and D. R. Whitney. On a test of whether one of two random variables is stochastically larger than the other. *The Annals of Mathematical Statistics*, 18(1):50–60, 3 1947. [Online; accessed 2021-10-01].
  - [36] Kenneth J. Berry, Janis E. Johnston, and Paul W. Mielke. Permutation methods: Permutation methods. *Wiley Interdisciplinary Reviews: Computational Statistics*, 3(6):527–542, 11 2011. [Online; accessed 2021-10-01].
  - [37] Yoav Benjamini and Yosef Hochberg. Controlling the false discovery rate: A practical and powerful approach to multiple testing. *Journal of the Royal Statistical Society: Series B (Methodological)*, 57(1):289–300, 1995.
  - [38] Stefan Debener, Falk Minow, Reiner Emkes, Katharina Gandras, and Maarten de Vos. How about taking a low-cost, small, and wireless eeg for a walk? *Psychophysiology*, 49(11):1617–1621, 2012.
-

- [39] Olave E. Krigolson, Chad C. Williams, Angela Norton, Cameron D. Hassall, and Francisco L. Colino. Choosing muse: Validation of a low-cost, portable eeg system for erp research. *Frontiers in Neuroscience*, 11:109, 2017. [Online; accessed 2021-10-14].
- [40] Elena Ratti, Shani Waninger, Chris Berka, Giulio Ruffini, and Ajay Verma. Comparison of medical and consumer wireless eeg systems for use in clinical trials. *Frontiers in Human Neuroscience*, 11:398, 2017. [Online; accessed 2021-10-14].



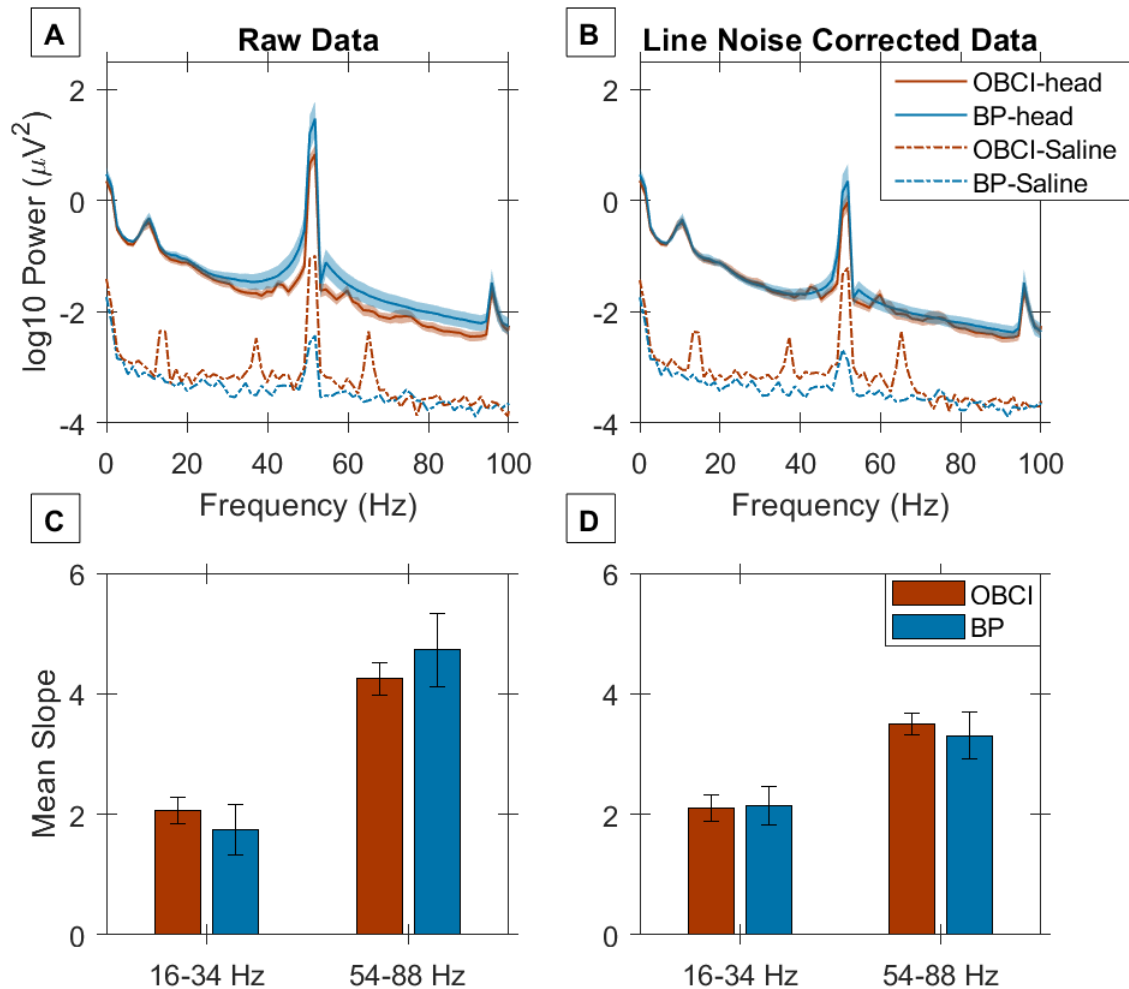

**Figure 1. Slope comparison of OpenBCI and Brain Products at baseline.** **A)** Baseline raw Power Spectral Density (PSD) for OpenBCI (*red trace*) and Brain Products (*blue trace*) averaged across 11 subjects (thickness of the trace indicates the standard error of PSD across subjects at each frequency). Dotted lines show PSD of shorted electrodes for instrument noise measurement. **C)** Slope of the PSD vs Frequency plot averaged across all subjects for two frequency ranges (16–34 Hz and 54–88 Hz) for OpenBCI (*red*) and Brain Products (*blue*). The error bars indicate the standard error. **B, D)** Same as A, C, but after selectively attenuating the mains/line noise component (see Methods for details).

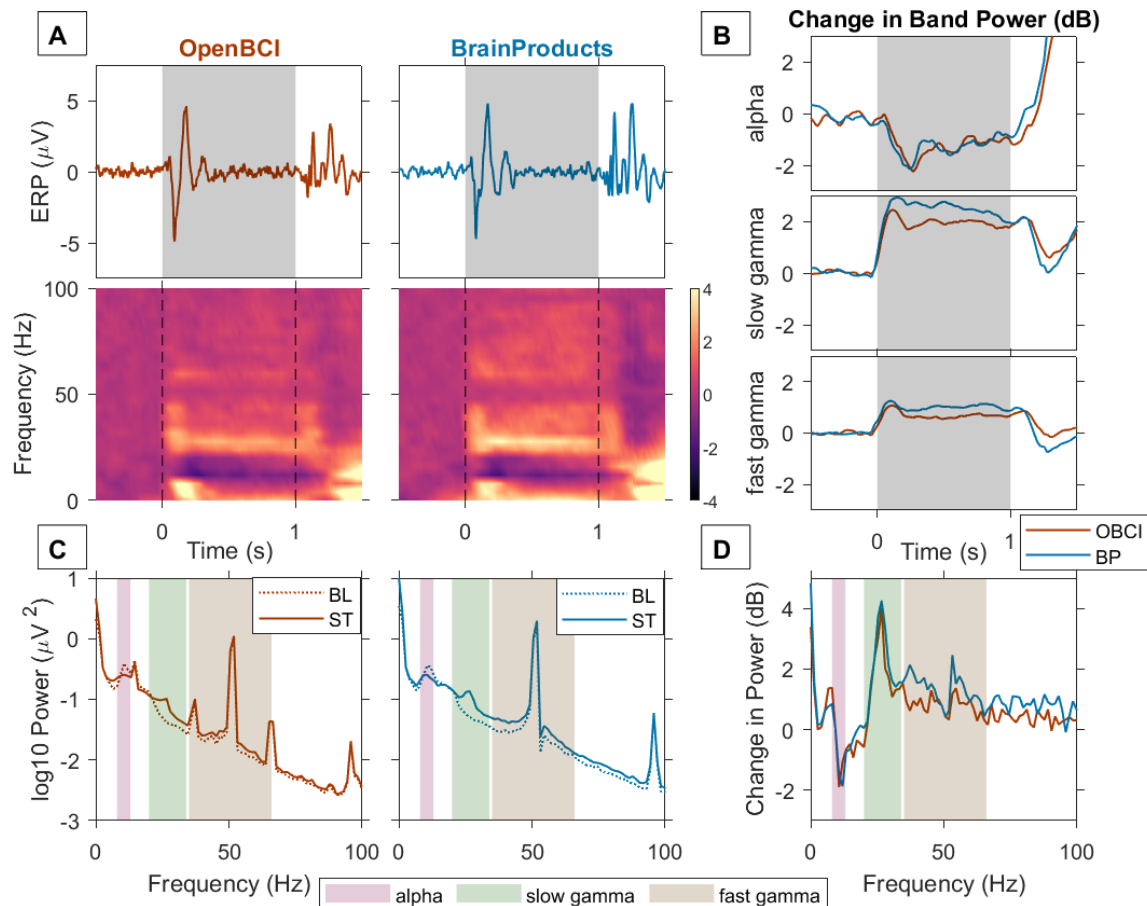

**Figure 2. Stimulus induced gamma response in an example subject.** **A)** Trial averaged EEG trace or ERP (*first row*) and time frequency spectrograms of change in power from baseline with time (*second row*). Vertical grey bars indicate stimulus duration (1 second). **B)** Change in Power (dB) from baseline as a function of time in alpha (8-13 Hz, *first row*), slow gamma (20-34 Hz, *second row*) and fast gamma (35-66 Hz, *third row*) bands recorded using OpenBCI (*red trace*) and Brain Products (*blue trace*). **C)** PSD for stimulus (*solid line*) and baseline (*dotted line*) averaged across 5 bipolar electrodes for OpenBCI (*left column*) and BrainProducts (*right column*). **D)** Change in power (dB) from baseline in stimulus period recorded using OpenBCI (*red trace*) and Brain Products (*blue trace*).

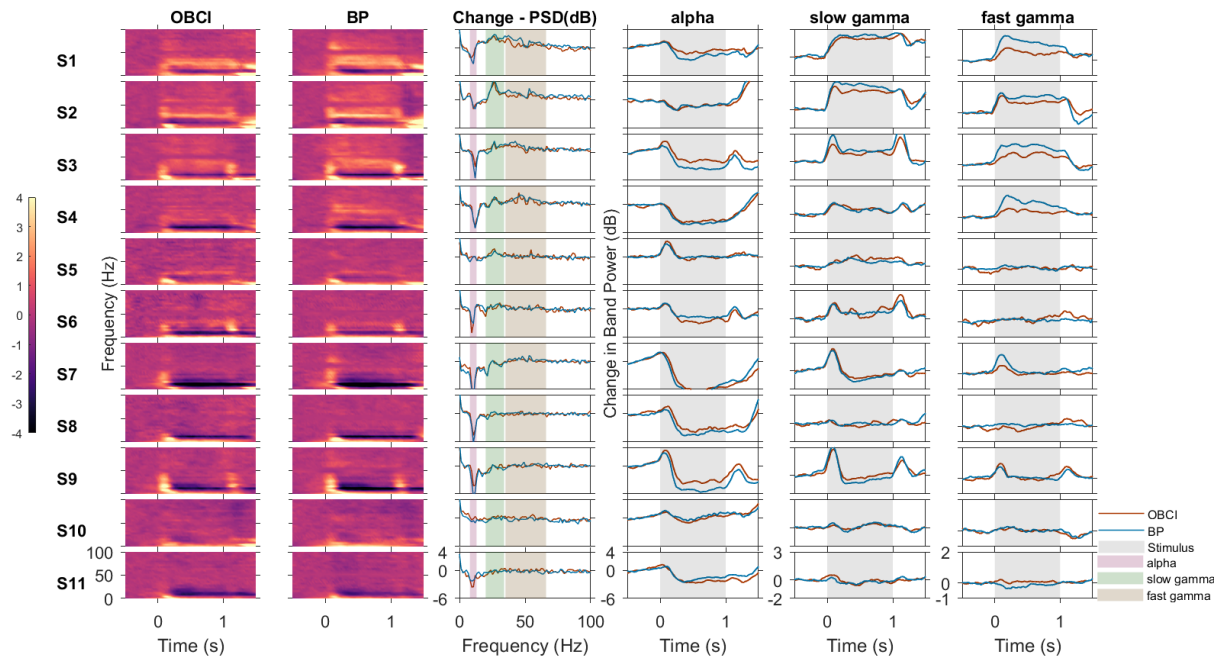

**Figure 3. Comparison of OpenBCI and BrainProduct recordings for all subjects.** Baseline subtracted time frequency spectrograms for OpenBCI (first column and *red trace* in other columns) and Brain Products (second column and *blue trace* in other columns), change in PSD (dB) from baseline in stimulus period vs frequency (third column), change in power (dB) with time for alpha (fourth column), slow gamma (fifth column) and fast gamma (sixth column) bands. Vertical bands in the last three columns indicate stimulus duration (*grey*). Each row represents one subject. The subjects are numbered in decreasing order of total gamma power.

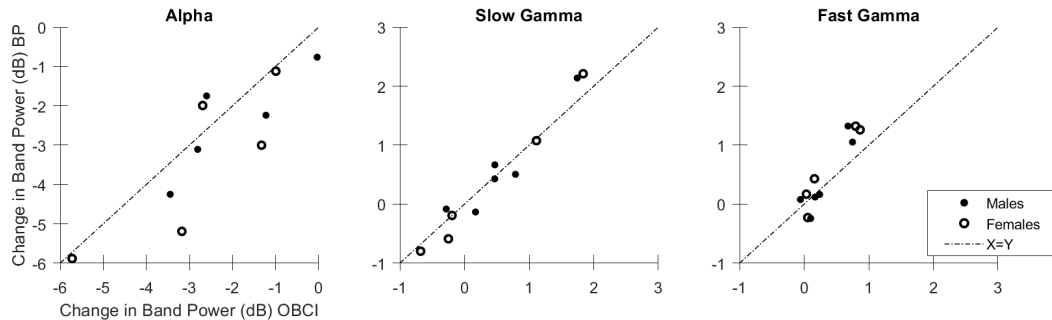

**Figure 4. Comparison of Change in Band Powers of OpenBCI and Brain Product recordings.** Change in band power from baseline in stimulus period of alpha, slow gamma and fast gamma oscillations recorded using OpenBCI (*x axis*) and Brain Products (*y axis*) for males (*filled circles*) and females (*open circles*). Dashed line indicates identity line.

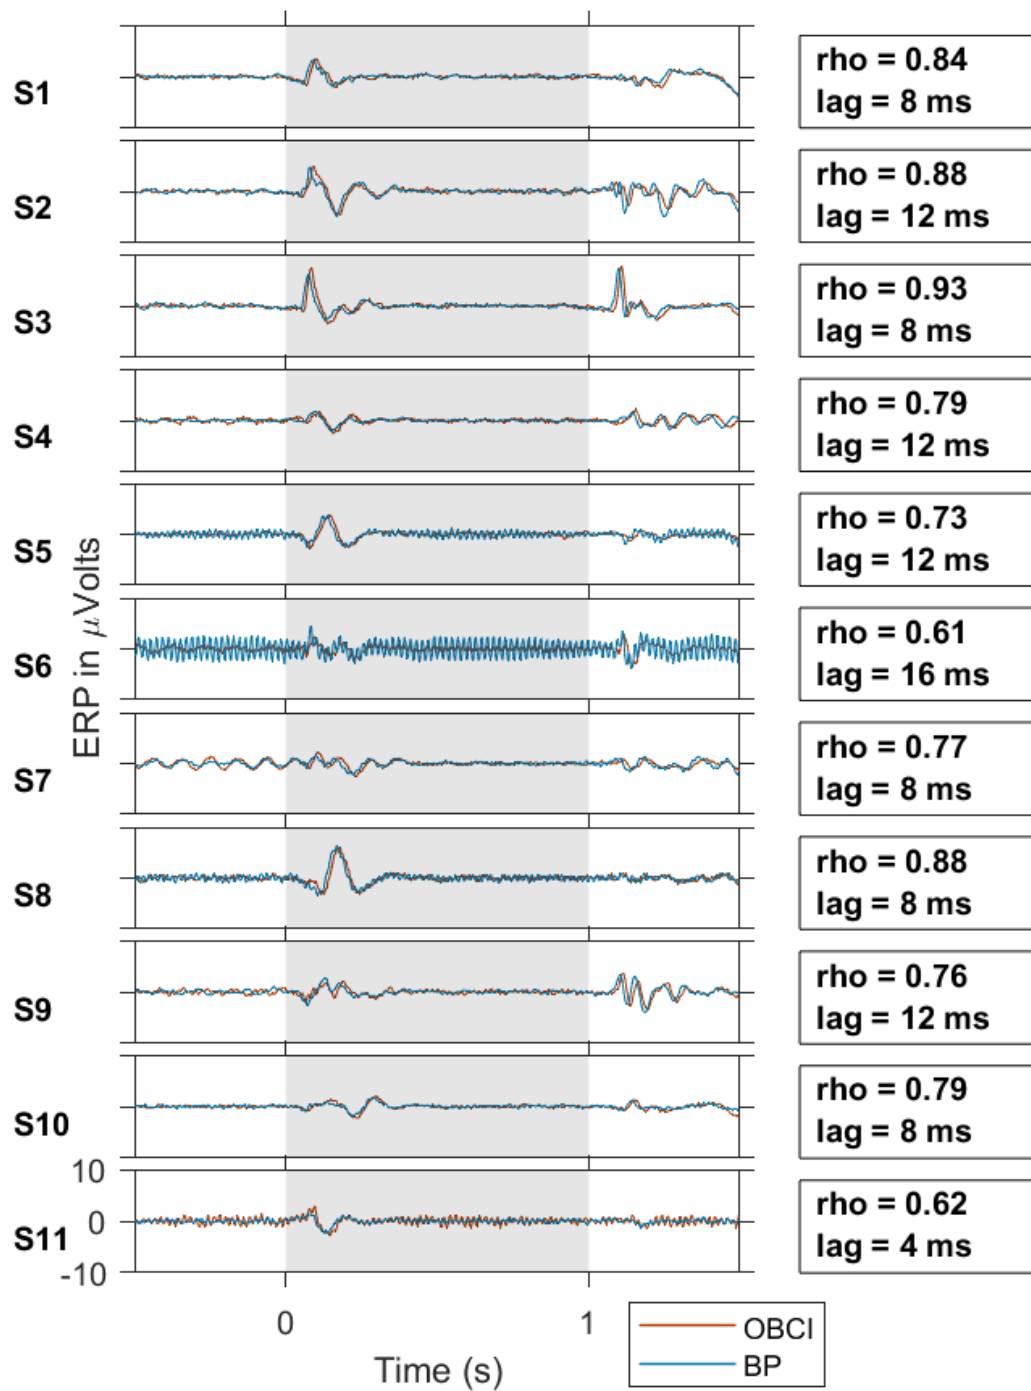

**Figure 5. ERP Plots of all subjects.** ERPs for OpenBCI (*red trace*) and Brain Products (*blue trace*) for all subjects. The subjects are numbered in decreasing order of gamma power, as in Figure 3. The vertical grey shaded region indicates the stimulus duration. The cross-correlation coefficient and lag between OpenBCI and Brain Products are indicated on the right for each subject.

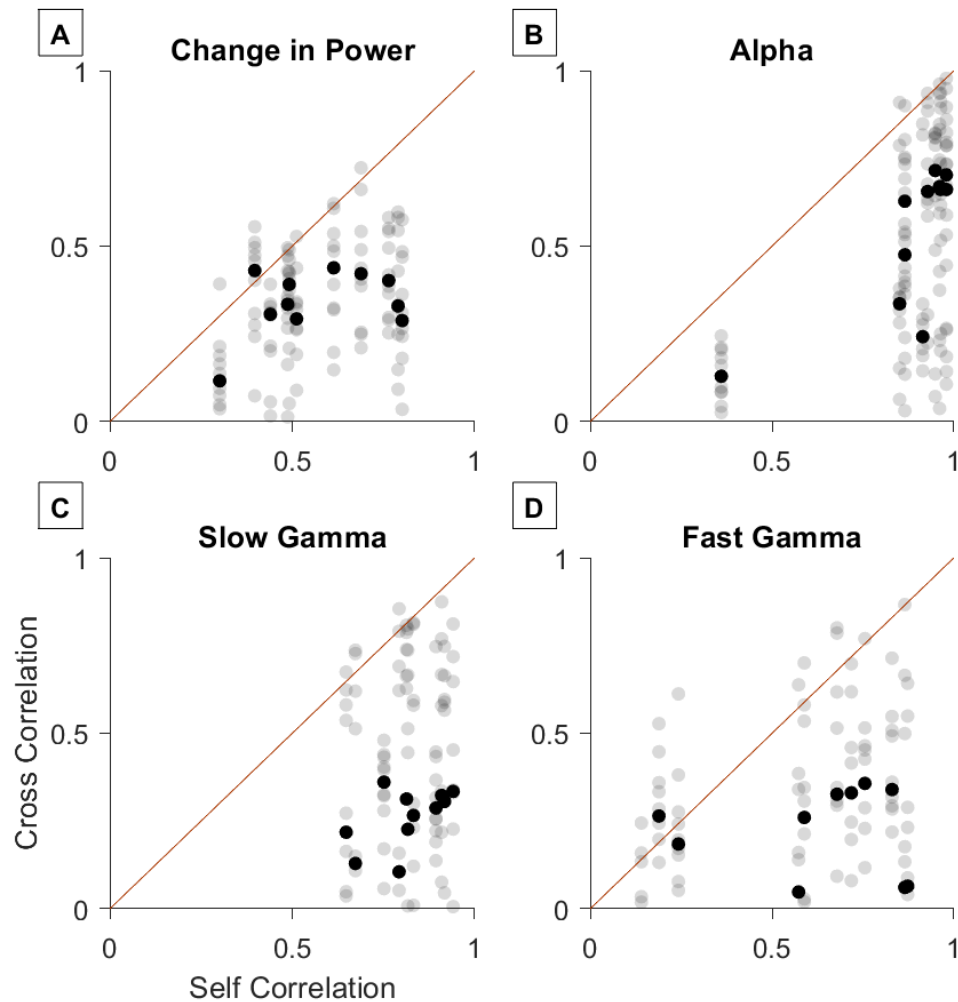

**Figure 6. Comparison of self-pair correlations and cross-pair correlations.** Self pair correlations (between OpenBCI and Brain Products recordings of same subjects) vs cross pair correlations (between OpenBCI and Brain Products recordings of different subjects) for change in PSD from baseline in stimulus period (A) and change in power with time for alpha (B), slow gamma (C) and fast gamma (D) bands. Red line indicates  $x=y$  line. The bold black marker indicates the median of the cross pair correlations for each subject.

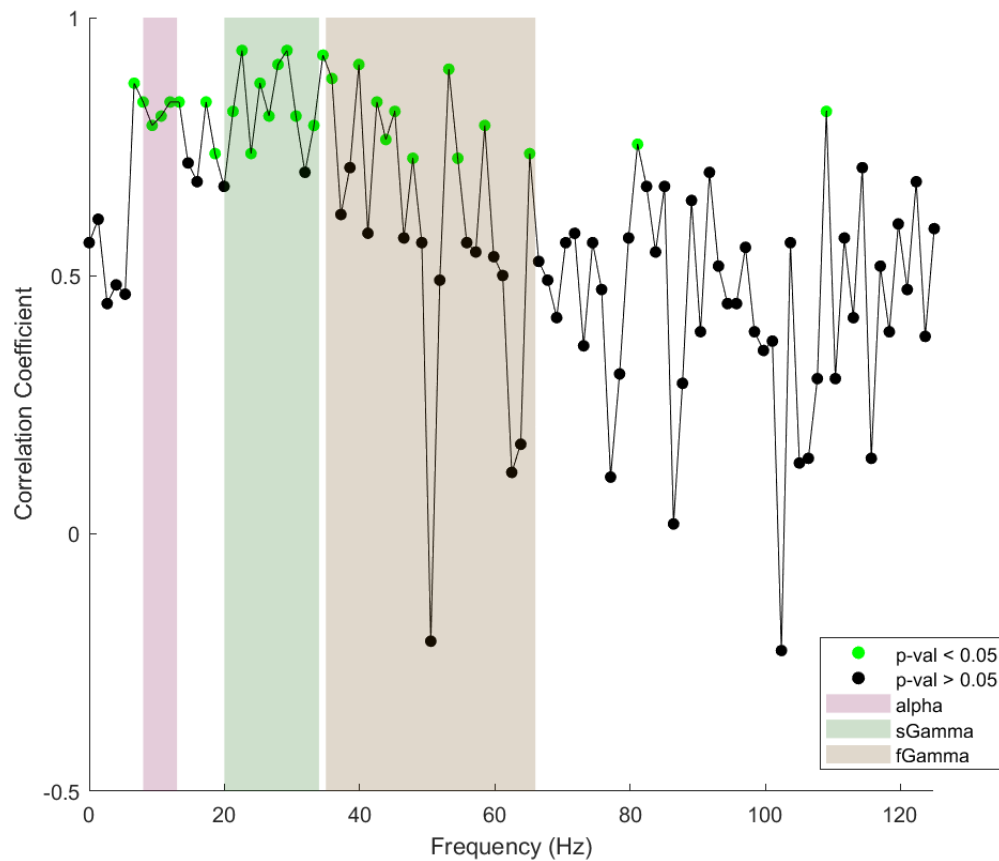

**Figure S1. Frequency wise Spearman correlation of power recorded using the two amplifiers across all subjects, plotted across frequency.** *Black circles* are for correlation values whose p-values calculated with permutation test are more than 0.05 and *green circles* are for correlation values whose p-values are less than 0.05. False Discovery Rate of p-values is controlled using Benjamini and Hochberg (1995) procedure.
